# Supplementary material
Source: PubMed Central journal article supplement (PMC5677574)
Supplement: NIHMS916531-supplement-Ssupplementary_figure.pdf [file NIHMS916531-supplement-Ssupplementary_figure.pdf]

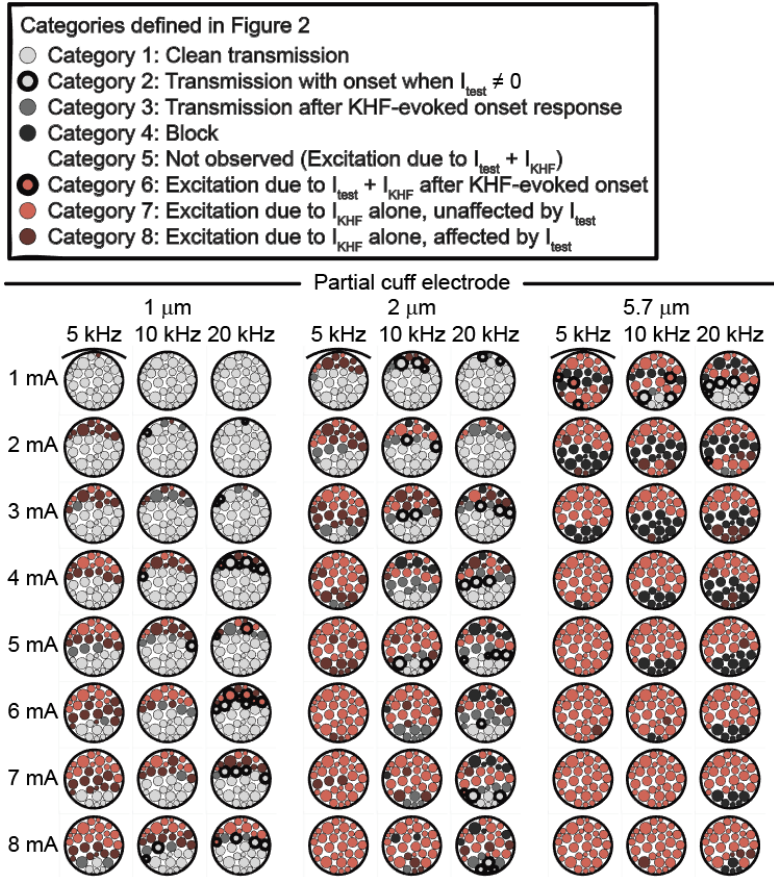

Supplemental Figure 1. Detailed version of the top section of Figure 3. Conduction responses across different myelinated axon diameters, and different frequencies and amplitudes of the KHF signal using the FEM with the partial cuff electrode. Each fascicle is coloured uniformly since the axon position within a given fascicle did not affect the response. Whereas Figure 3 displays the conduction responses using three simplified categories (transmission, excitation, and block), this figure includes all eight categories used in the classification algorithm described in Figure 2.
